# Supplementary material for: Electronic and optical properties of surface hydrogenated armchair graphene nanoribbons: a theoretical study
Source: Royal Society of Chemistry journal article supplement (doi:10.1039/c5ra26686f), 2016-01-01
Supplement: c5ra26686f1.pdf [file c5ra26686f1.pdf]

## Supplementary Information

### **Electronic and optical properties of surface hydrogenated armchair graphene nanoribbons: A theoretical study**

Xi Zhu\*<sup>a</sup> and Min Wang\*<sup>b</sup>

<sup>a</sup> Division of Materials Science, School of Materials Science and Engineering,  
Nanyang Technological University, 50 Nanyang Avenue, Singapore 639798,

Singapore. E-mail: zhuxi@ntu.edu.sg

<sup>b</sup> Institute for Clean Energy & Advanced Materials, Faculty of Materials and Energy,  
Southwest University, Chongqing 400715, China. Email: minwang@swu.edu.cn

#### **Table of Contents**

|     |                                                                     |   |
|-----|---------------------------------------------------------------------|---|
| S1. | Comparison between W8:H2:H6 and W8:H2:H6-2.....                     | 2 |
| S2. | The effective width model in one-, two- and three-row H-AGNRs ..... | 3 |
|     | 2.1 One-row H-AGNRs .....                                           | 3 |
|     | 2.2 Two-row H-AGNRs.....                                            | 4 |
|     | 2.3 Three-row H-AGNRs.....                                          | 5 |
| S3. | Electron wavefunction plot for all the cases.....                   | 5 |
| S4. | Soft wall in the H-AGNRs .....                                      | 7 |

## S1. Comparison between W8:H2:H6 and W8:H2:H6-2

Table S 1. LDA band gaps, GW band gaps, BSE energies and binding energies ( $E_b$ ) in W8:H2:H6 and W8:H2:H6-2 cases.

|            | LDA(eV) | GW(eV) | BSE(eV) | $E_b$ (eV) |
|------------|---------|--------|---------|------------|
| W8:H2:H6   | 1.12    | 3.49   | 1.74    | 1.75       |
| W8:H2:H6-2 | 1.09    | 3.41   | 1.69    | 1.72       |

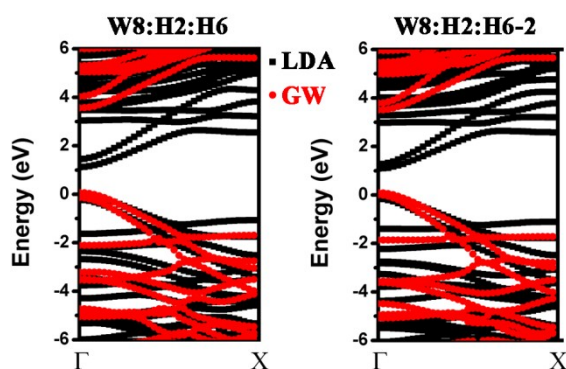

Fig. S1 LDA and GW band structures for  $W_8:H_2:H_6$  and  $W_8:H_2:H_6-2$  cases.

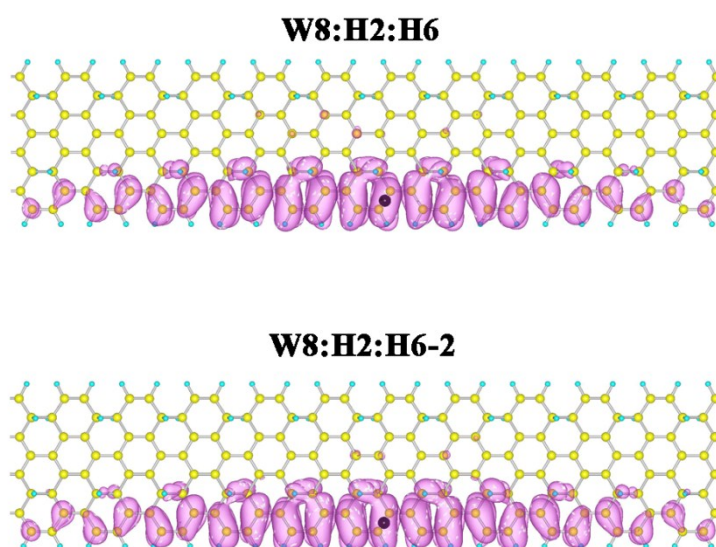

Fig. S2 Exciton wavefunction plots for  $W_8:H_2:H_6$  and  $W_8:H_2:H_6-2$  cases.

## S2. The effective width model in one-, two- and three-row H-AGNRs

The order of the band gaps in some pristine AGNRs is listed below:

$$Gap_{W5} < Gap_{W6} < Gap_{W2} < Gap_{W3} < Gap_{W4} < Gap_{W1}$$

### 2.1 One-row H-AGNRs

#### 1. For W8 serials:

| W8:H(n) | Segments | Effective width segment (EW-W(k)) |
|---------|----------|-----------------------------------|
| W8:H2   | W1, W6   | EW-W6                             |
| W8:H4   | W3, W4   | EW-W3                             |
| W8:H6   | W5, W2   | EW-W5                             |

The order of band gap is

$$Gap_{W8} < Gap_{W8:H6} < Gap_{W8:H2} < Gap_{W8:H4}$$

#### 2. For W9 serials:

| W9:H(n) | Segments | Effective width segment (EW-W(k)) |
|---------|----------|-----------------------------------|
| W9:H3   | W2, W6   | EW-W6                             |
| W9:H5   | W4, W4   | EW-W4                             |

The order of band gap is

$$Gap_{W9} < Gap_{W9:H3} < Gap_{W9:H5}$$

#### 3. For W10 serials:

| W10:H(n) | Segments | Effective width segment (EW-W(k)) |
|----------|----------|-----------------------------------|
| W10:H2   | W1, W8   | EW-W8                             |
| W10:H4   | W3, W6   | EW-W6                             |
| W10:H6   | W5, W4   | EW-W5                             |
| W10:H8   | W7, W2   | EW-W2                             |

The order of band gap is

$$Gap_{W10:H2} < Gap_{W10:H6} < Gap_{W10:H4} < Gap_{W10:H8} < Gap_{W10}$$

## 2.2 Two-row H-AGNRs

### 1. For W8 serials:

| W8:H(n):H(m) | Segments | Effective width segment (EW-W(k)) |
|--------------|----------|-----------------------------------|
| W8:H2:H4     | W1,W1,W4 | EW-W4                             |
| W8:H2:H6     | W1,W2,W3 | EW-W2                             |
| W8:H4:H6     | W1,W2,W3 | EW-W2                             |

The order of band gap is

$$Gap_{W8:H2:H6} \approx Gap_{W8:H4:H6} < Gap_{W8:H2:H4}$$

### 2. For W9 serials:

(for symmetry, the structure of W9:H3:H5 is the same as W9:H5:H7)

| W9:H(n):H(m) | Segments | Effective width segment (EW-W(k)) |
|--------------|----------|-----------------------------------|
| W9:H3:H5     | W1,W2,W4 | EW-W2                             |
| W9:H3:H7     | W2,W2,W3 | EW-W2                             |

The order of band gap is

$$Gap_{W9:H3:H7} \approx Gap_{W9:H3:H5}$$

### 3. For W10 serials:

| W9:H(n):H(m) | Segments | Effective width segment (EW-W(k)) |
|--------------|----------|-----------------------------------|
| W10:H2:H4    | W1,W1,W6 | EW-W6                             |
| W10:H2:H6    | W1,W3,W4 | EW-W3                             |
| W10:H2:H8    | W1,W2,W5 | EW-W5                             |
| W10:H4:H6    | W1,W3,W4 | EW-W3                             |
| W10:H4:H8    | W2,W3,W3 | EW-W2                             |
| W10:H6:H8    | W1,W2,W5 | EW-W5                             |

The order of band gap is

$$Gap_{W10:H6:H8} \approx Gap_{W10:H2:H8} < Gap_{W10:H2:H4} < Gap_{W10:H4:H8} < Gap_{W10:H2:H6} \approx Gap_{W10:H4:H6}$$

## 2.3 Three-row H-AGNRs

There is only one case for the W8 and W9 serials when the adsorption row number is three.

For W10 serials

| W10:H(n):H(m):H(l) | Segments    | Effective width segment (EW-W(k)) |
|--------------------|-------------|-----------------------------------|
| W10:H2:H4:H6       | W1,W1,W1,W4 | EW-W4                             |
| W10:H2:H4:H8       | W1,W1,W2,W3 | EW-W2                             |
| W10:H2:H6:H8       | W1,W1,W2,W3 | EW-W2                             |
| W10:H4:H6:H8       | W1,W1,W2,W3 | EW-W2                             |

The order of band gap is

$$Gap_{W10:H2:H4:H8} \approx Gap_{W10:H2:H6:H8} \approx Gap_{W10:H4:H6:H8} < Gap_{W10:H2:H4:H6}$$

## S3. Electron wavefunction plot for all the cases

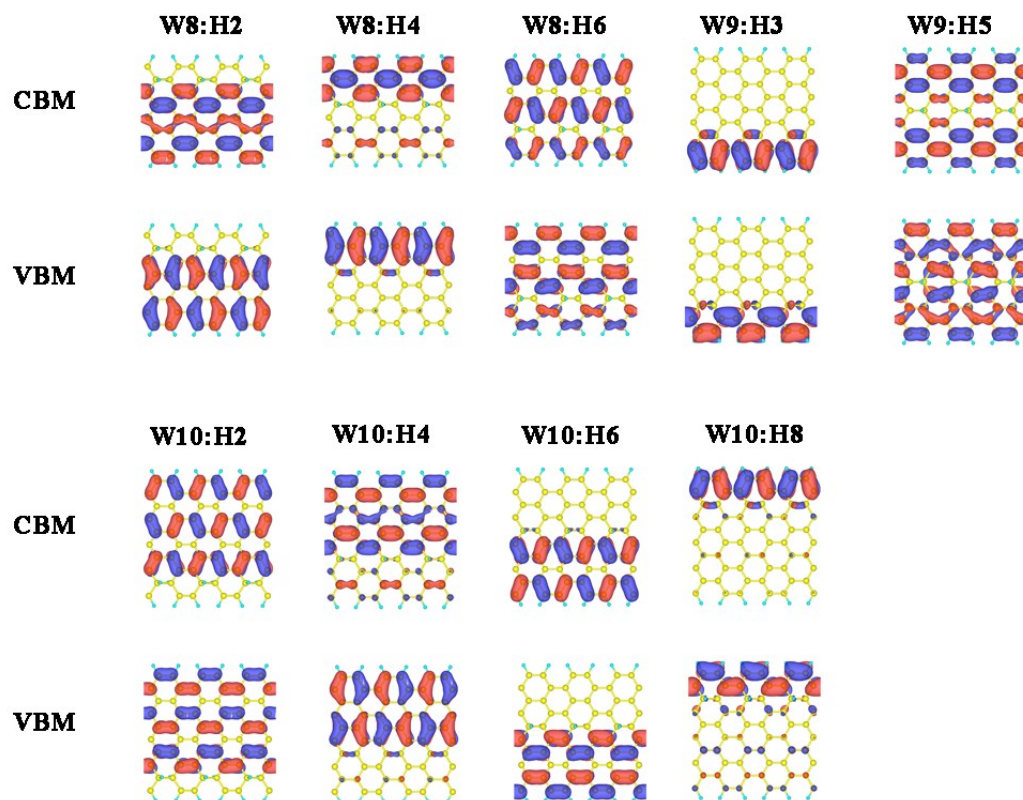

Fig. S3. VBM/CBM plot for the one-row H-AGNRs with an isovalue of  $0.1 \text{ eV}/\text{\AA}^3$

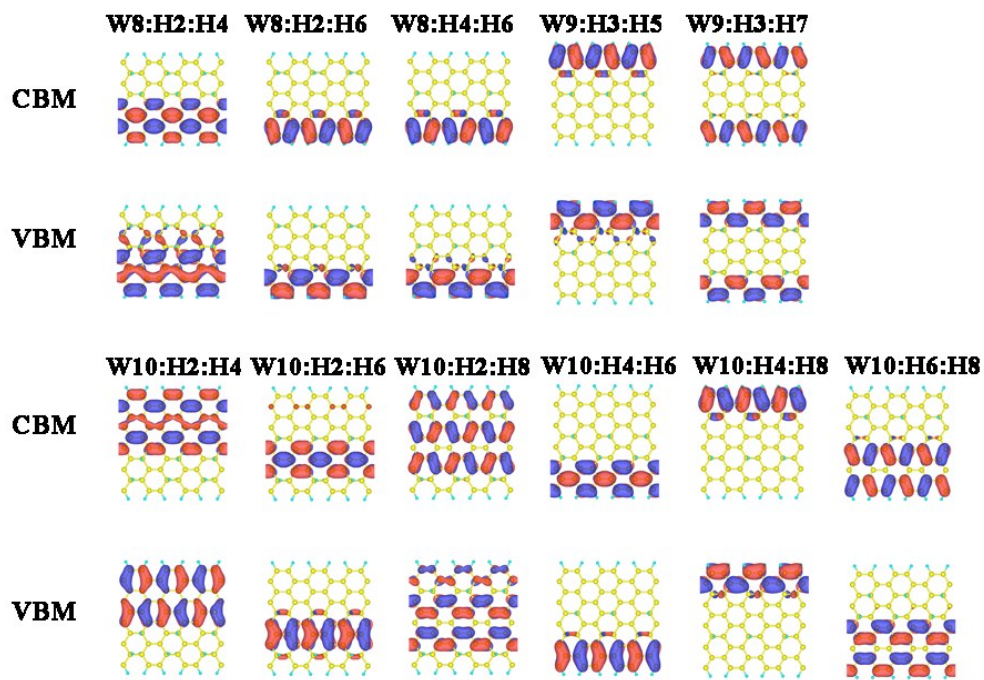

Fig. S4. VBM/CBM plot for the two-row H-AGNRs with an isovalence of  $0.1 \text{ eV}/\text{\AA}^3$

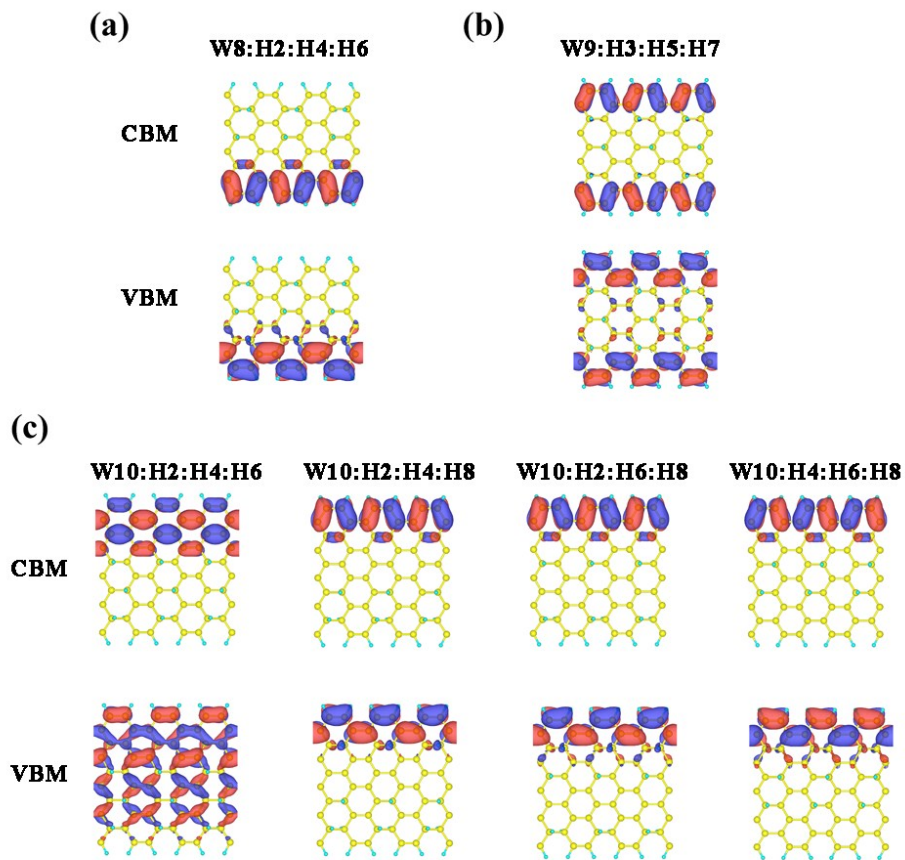

Fig. S5. VBM/CBM plot for the three-row H-AGNRs with an isovalence of  $0.1 \text{ eV}/\text{\AA}^3$

## S4. Soft wall in the H-AGNRS

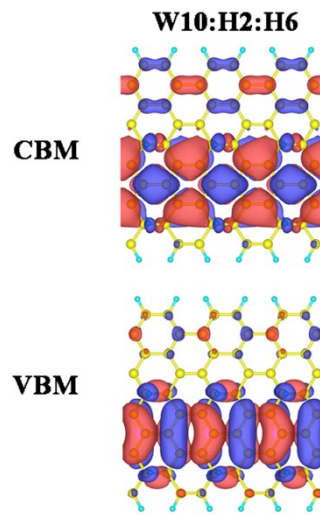

Fig. S6. VBM/CBM plot for W10:H2:H6 case with an isovalue of  $0.05 \text{ eV/\AA}^3$
